# Supplementary material for: Targeted imaging of very late antigen-4 for noninvasive assessment of lung inflammation-fibrosis axis
Source: Springer Nature journal article supplement (doi:10.1186/s13550-023-01006-0), 2023-06-05
Supplement: MOESM1 [file 13550_2023_1006_MOESM1_ESM.pdf]

## SUPPLEMENTAL METHODS AND RESULTS

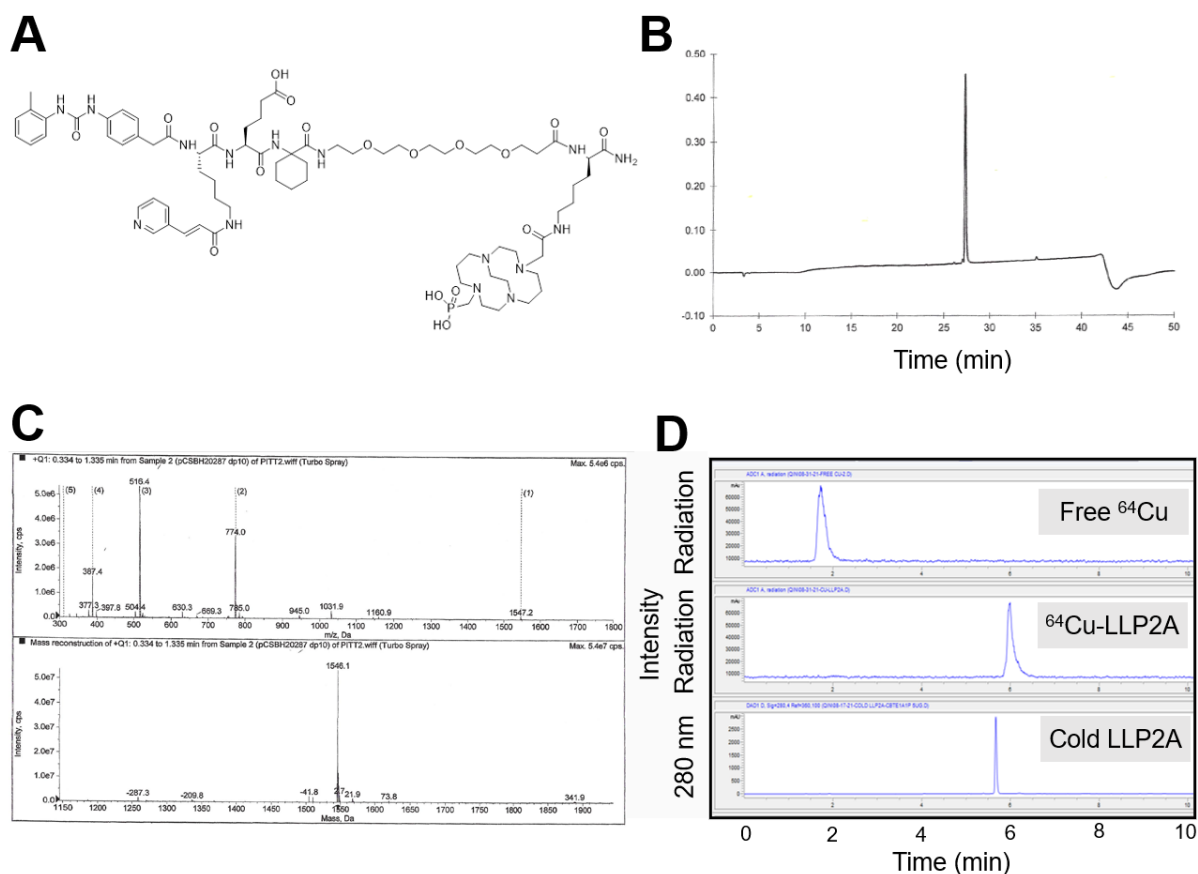

**Fig. S1. Chemical structure and radiolabeling of CB-TE1A1P-PEG4-LLP2A.** The chemical structure **(A)** of LLP2A-CB-TE1A1P (molecular weight: 1,547) which was synthesized by Auspep (Australia) and its purity and identity was confirmed by high-pressure liquid chromatography **(B)** and mass spectrometry **(C)**. Quality control of copper-64 radiolabeling of CB-TE1A1P-PEG4-LLP2A was performed by radio-HPLC to confirm radiolabeling efficiency >95% prior to injection of  $^{64}\text{Cu}$ -LLP2A to animals. A representative example **(D)** demonstrates a retention time of ~2 minutes for free copper-64 ( $^{64}\text{Cu}$ ) (top panel) vs. ~ 6 minutes for  $^{64}\text{Cu}$ -LLP2A (middle panel) and unlabeled LLP2A (lower panel).

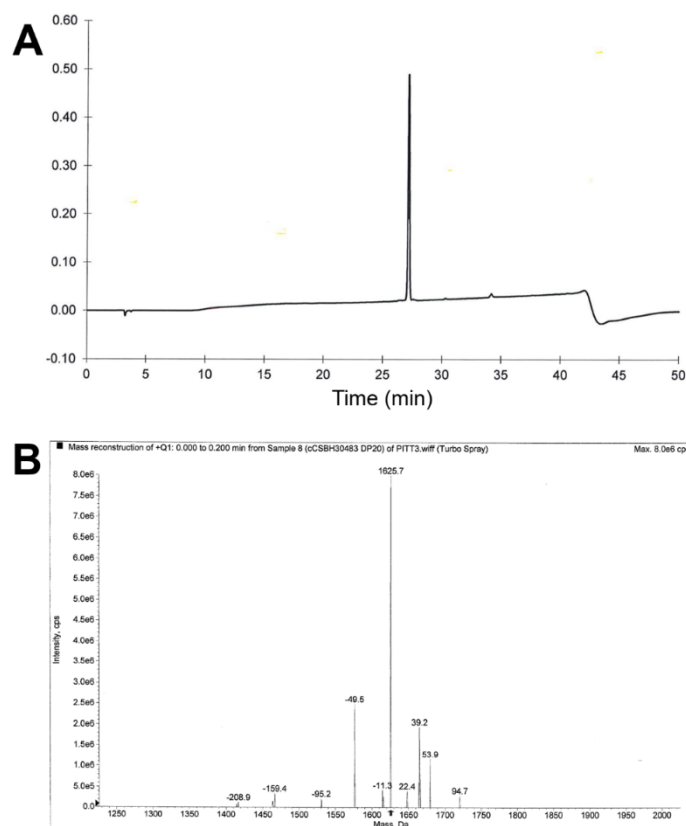

**Fig. S2. Confirmation of the purity and identity of LLP2A-Biotin.** LLP2A-Biotin (molecular weight: 1,626) was synthesized by Auspep (Australia) and its purity and identity was confirmed by high-pressure liquid chromatography **(A)** and mass spectrometry **(B)**.

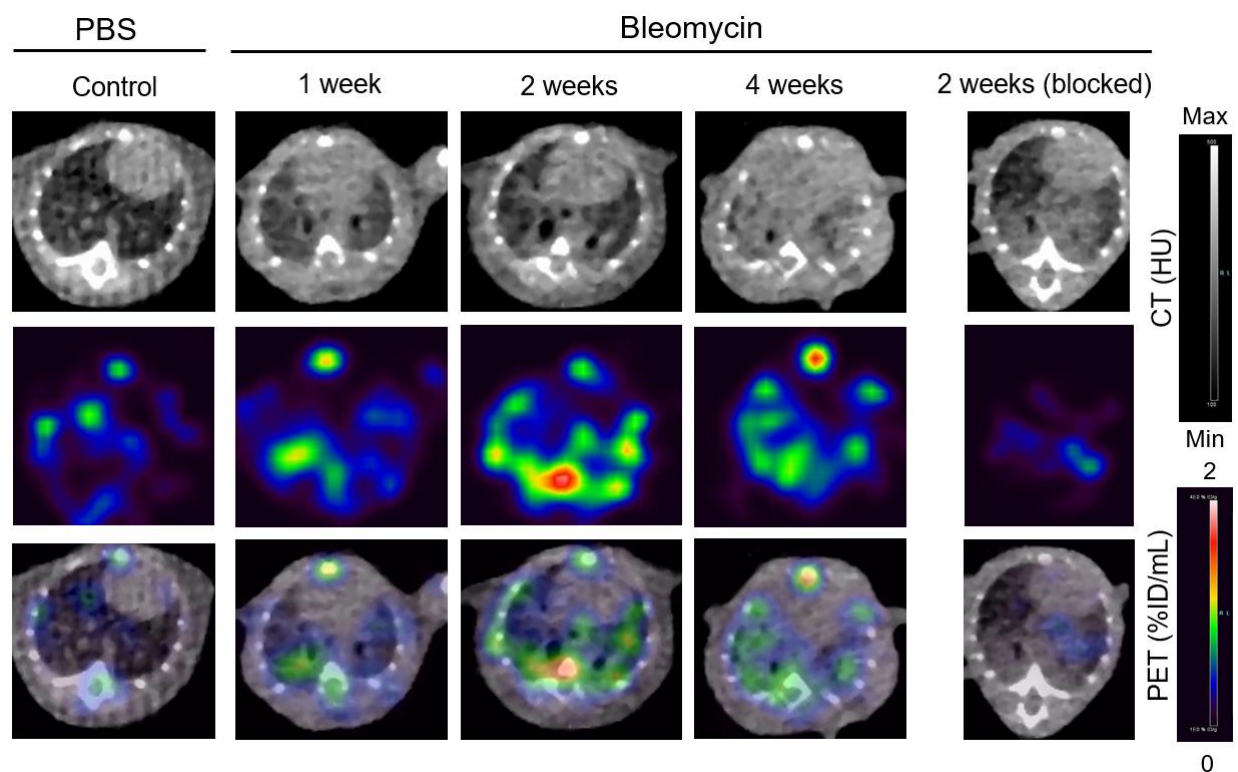

**Fig. S3. Delayed  $^{64}\text{Cu}$ -LLP2A PET/CT in bleomycin-induced lung injury.** Representative axial CT, PET, and co-registered PET/CT acquired one day after administration of  $^{64}\text{Cu}$ -LLP2A demonstrate persistent accumulation of the tracer in bleomycin-injured lungs compared to control lungs. The specificity of  $^{64}\text{Cu}$ -LLP2A uptake is demonstrated by blocking  $^{64}\text{Cu}$ -LLP2A uptake by co-injection of excess non-labeled LLP2A-CB-TE1A1P.

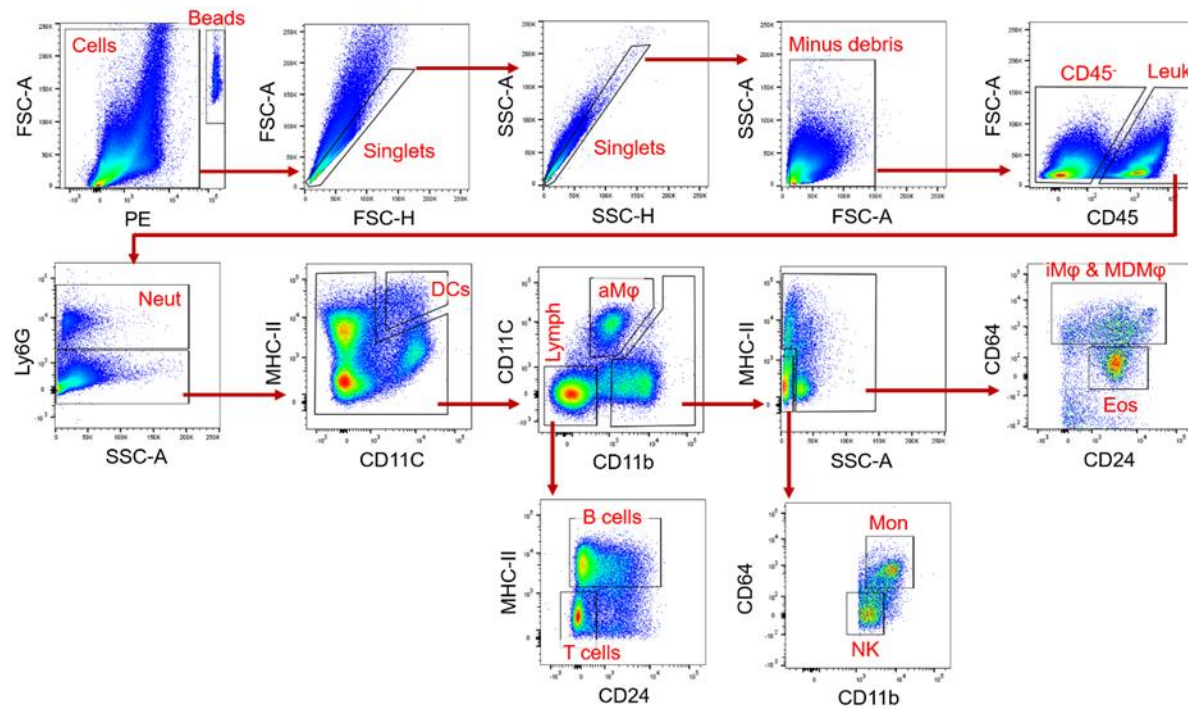

**Fig. S4. Flow cytometric gating strategy for identification of leukocyte subsets in murine lungs.** A representative gating strategy for identification of the major leukocyte subsets in enzymatically dissociated single cells from murine lungs. Abbreviations: aMφ: alveolar macrophages; DC: dendritic cells; MDMφ: monocyte-derived macrophages; Eos: eosinophils; iMφ: interstitial macrophages; Leuk: leukocytes; Lymph: lymphocytes; Mon: monocytes; Neut: neutrophils; NK: natural killer cells.

**Table S1. List of general reagents.**

| <b>Reagent</b>                                  | <b>Company</b> | <b>Catalog #</b> |
|-------------------------------------------------|----------------|------------------|
| Bleomycin sulfate                               | Sigma-Aldrich  | B8416-15UN       |
| Low protein binding tubes                       | Eppendorf      | 022431081        |
| Cell strainer (70 $\mu$ m)                      | VWR            | 10199-656        |
| Collagenase D                                   | Sigma          | 11088866001      |
| DNase I                                         | Sigma          | D4527-10KU       |
| HBSS with Ca <sup>2+</sup> and Mg <sup>2+</sup> | Gibco          | 14025-076        |
| Hydroxyproline colorimetric assay kit           | BioVision      | K555             |
| Phosphate-buffered saline (PBS)                 | Lonza          | 17-512F          |
| ProLong Gold Antifade Mountant with DAPI        | Thermo Fisher  | P36931           |
| RBC lysis buffer (10X)                          | BioLegend      | 420301           |
| QuantiTect reverse transcription kit            | Qiagen         | 205313           |
| TaqMan gene expression master mix               | Thermo Fisher  | 4369510          |
| Triton X-100                                    | Sigma          | 9002-93-1        |
| TRIzol                                          | Thermo Fisher  | 15596026         |

**Table S2. List of reagents used for flow cytometry.**

| <b>Antibody</b>                 | <b>Company</b> | <b>Catalog #</b> |
|---------------------------------|----------------|------------------|
| Anti-mouse/human CD11b-AF488    | BioLegend      | 101217           |
| Anti-mouse CD11c-PerCP          | BioLegend      | 117326           |
| Anti-mouse CD24-AF700           | BioLegend      | 101836           |
| Anti-mouse CD45-BV421           | BioLegend      | 103134           |
| Anti-mouse CD64-APC             | BioLegend      | 139306           |
| Anti-mouse Ly6C-APC-Cy7         | BioLegend      | 128026           |
| Anti-mouse Ly6G-BV395           | BD Biosciences | 563978           |
| Anti-mouse I-A/I-E-BV605        | BioLegend      | 107639           |
| Anti-mouse SiglecF-BV510        | BD Biosciences | 740158           |
| Anti-Mouse CD16/CD32 (Fc Block) | BD Pharmingen  | 553141           |
| Precision count beads           | BioLegend      | 424902           |
| Streptavidin-Phycoerythrin      | BioLegend      | 405203           |

**Table S3. List of primers used for quantitative RT-PCR.**

| <b>Assay Name</b> | <b>Gene</b>                                    | <b>Assay ID</b> |
|-------------------|------------------------------------------------|-----------------|
| <i>Rn18s</i>      | 18S ribosomal RNA                              | Mm03928990_m1   |
| <i>Hprt</i>       | Hypoxanthine guanine phosphoribosyltransferase | Mm01545399_m1   |
| <i>Tbp</i>        | TATA box binding protein                       | Mm00446971_m1   |
| <i>Gusb</i>       | Glucuronidase, beta                            | Mm01197698_m1   |
| <i>Gapdh</i>      | Glyceraldehyde-3-phosphate dehydrogenase       | Mm99999915_g1   |
| <i>Lox</i>        | Lysyl oxidase                                  | Mm00495386_m1   |
| <i>Loxl2</i>      | Lysyl oxidase like-2                           | Mm00804740_m1   |
| <i>Col1a</i>      | Pro-alpha-1 chains of type I collagen          | Mm00801666_g1   |
| <i>Fn1</i>        | Fibronectin-1                                  | Mm01256744_m1   |

**Table S4. Radio-HPLC methods (Agilent 1260 Infinity HPLC, C18 Luna Analytical Column).**

| <b>Time</b>          | <b>Solvent 1:</b><br>H <sub>2</sub> O with 0.1% v/v<br>trifluoroacetic acid | <b>Solvent 2:</b><br>Acetonitrile with 0.1% v/v<br>trifluoroacetic acid | <b>Flow rate</b><br><b>(mL/min)</b> |
|----------------------|-----------------------------------------------------------------------------|-------------------------------------------------------------------------|-------------------------------------|
| 0 → 2 min            | 100%                                                                        | 0%                                                                      | 2.0                                 |
| 2 → 8 min (gradient) | 100% → 10%                                                                  | 0% → 90%                                                                | 2.0                                 |
| 8 → 12 min           | 10%                                                                         | 90%                                                                     | 2.0                                 |
